# Supplementary material
Source: HighWire-hosted journal article supplement (https://www.cancerbiomed.org/content/20/11/869)
Supplement: media-1 [file media-1.pdf]

## Supplementary material

**Table S1** Names and sequences of primers used for RT-PCR

| Name           | Sense (5'-3')           | Antisense (5'-3')       |
|----------------|-------------------------|-------------------------|
| Wnt3           | GATCCCAGTCGCGGATC       | GAGCCAGGTTTAGGGAGCTG    |
| VEGFR1         | CACTGACATACCCAAACTTGTGC | GTCCCATGTTATTCTTTGCCCAT |
| VEGFR2         | AGAAGTGGCAACGGCACCT     | CAAAGCATTGCCCATTCGAT    |
| GAPDH          | AGGTCGGTGTGAACGGATTG    | TGTAGACCATGTAGTTGAGGTCA |
| $\beta$ -Actin | GAAGTGTGACGTTGACATCCGTA | CTCAGGAGGAGCAATGATCTTGA |
